1 **Running title:** Dengue virus serotypes co-circulation

2

3 **Co-circulation of Dengue Virus Serotypes 1 and 3 during the 2019 epidemic in**

4 **Dar es Salaam, Tanzania**

5

6 **Gaspary Mwanyika<sup>1,2,3\*</sup>, Leonard E.G. Mboera<sup>3</sup>, Sima Rugarabamu<sup>1,3,4</sup>, Julius**

7 **Lutwama<sup>5</sup>, Calvin Sindato<sup>3,6</sup>, Janusz T. Paweska<sup>7</sup> and Gerald Misinzo<sup>1,3</sup>**

8

9 *<sup>1</sup>Department of Veterinary Microbiology, Parasitology and Biotechnology, Sokoine*

10 *University of Agriculture, Morogoro, Tanzania*

11 *<sup>2</sup>Department of Health Science and Technology, Mbeya University of Science and*

12 *Technology, Mbeya, Tanzania*

13 *<sup>3</sup>SACIDS Foundation for One Health, Sokoine University of Agriculture, Morogoro,*

14 *Tanzania*

15 *<sup>4</sup>Department of Microbiology and Immunology, Muhimbili University of Health and*

16 *Allied Sciences, Dar-Salaam, Tanzania*

17 *<sup>5</sup>Department of Arbovirology, Emerging and Re-emerging Infectious Diseases,*

18 *Uganda Virus Research Institute, Entebbe, Uganda*

19 *<sup>6</sup>National Institute for Medical Research, Tabora, Tanzania*

20 *<sup>7</sup>National Institute for Communicable Diseases, National Health Laboratory Service,*

21 *Sandringham, Johannesburg, South Africa*

22

23 *\*[gaspariy.mwanyika@sacids.org](mailto:gaspariy.mwanyika@sacids.org)*

24

25

26

27

28 **Abstract**

29 **Background**

30 Dengue is an important mosquito-borne viral disease in tropical and sub-tropical  
31 countries. In this study molecular characterization was carried out to determine  
32 dengue viruses circulating among patients at health facilities during 2019 epidemic in  
33 Dar es Salaam, Tanzania.

34 **Methods**

35 The study involved outpatients seeking care for febrile illness at four health facilities  
36 in Kinondoni and Ilala Districts of Dar es Salaam City in Tanzania. A total of 45 sera  
37 from the outpatients were confirmed dengue-positive for dengue virus (DENV) non-  
38 structural protein 1 (NS1) antigen and/or NS1-IgG/IgM antibodies using on-site rapid  
39 test. The presence of the virus was detected by reverse-transcription polymerase  
40 chain reaction (RT-PCR) method. Of the 45 sera, 20 samples were selected  
41 randomly for identification of specific dengue virus serotypes using RT-PCR followed  
42 by evaluation of resulting amplicons on agarose gel electrophoresis.

43 **Findings and significance**

44 Both Dengue virus serotypes 1 (DENV-1) and 3 (DENV-3) were detected in the  
45 samples tested with the former being dominant. We present the first evidence of  
46 dengue virus co-infection of DENV-1 and DENV-3 serotypes in Tanzania. The  
47 emergence of DENV-1 indicates the possibility of importation of the virus to Tanzania  
48 from endemic countries. Due to DENV serotype co-circulation, there is an increased  
49 risk of severe dengue in future epidemics. Our findings advocate the importance of  
50 genomic-based surveillance to provide rapid evidence of dengue virus  
51 emergence/re-emergence and spread.

52 **Keywords:** Dengue virus, serotype, co-circulation, epidemic, Tanzania

## 53 **Author Summary**

54 Dengue viruses are the most important mosquito-borne pathogens that pose a  
55 serious global health threat. Tanzania has reported several dengue virus epidemics  
56 since 2010 with the majority of the epidemics occurring in Dar-es-Salaam city. Until  
57 August 2019, a total of 6,859 dengue cases have been confirmed in the country. We  
58 performed molecular characterization of dengue viruses (DENV) circulating during  
59 the 2019 epidemic phase. It was found that DENV-1 serotype was dominant during  
60 the epidemic and two samples of the tested sera were co-infected by DENV-1 and  
61 DENV-3 serotypes. These findings emphasize the importance of genomic-based  
62 surveillance of dengue viruses in Tanzania to guide strategies for appropriate  
63 interventions.

64

## 65 **Introduction**

66 In recent years, Dengue has become the major mosquito-borne viral disease in  
67 tropical and subtropical regions affecting people of all age groups in over 128  
68 countries with 50-100 million infections annually [1]. In Africa, dengue is endemic in  
69 34 countries with recent epidemics reported mostly in East Africa [2]. Recent dengue  
70 outbreaks have been reported in Tanzania, Mozambique, Ghana, Benin, Ivory Coast  
71 and Mauritius [3]. Population growth, increased rate and volume of movement of  
72 people, uncontrolled urbanization and climate variability/change have been  
73 described to be responsible for global spread of dengue virus (DENV) [4].

74 In Tanzania, dengue was first described in 1823 by Spanish sailors in the  
75 southern coastal region [5]. Since 2010, four dengue outbreaks have been reported  
76 in Tanzania [6–9]. To date, the 2019 epidemic seems to be the worst one in the  
77 country. From January to August 2019, a total of 6,859 dengue fever cases and 13  
78 deaths have been reported in the country with a large proportion from Dar es Salaam

79 region. Other affected regions include Tanga, Pwani, Lindi, Morogoro, Kagera,  
80 Arusha and Ruvuma [9,10].

81         There are five antigenic distinct serotypes of dengue virus (DENV-1 to 5)  
82 [11,12] that can cause mild dengue fever (DF) to life-threatening dengue  
83 haemorrhagic fever (DHF) and dengue shock syndrome (DSS) often presented with  
84 atypical clinical manifestations like organ impairment [13,14]. Since 1960, four DENV  
85 serotypes (DENV-1 to 4) have been reported in Africa with DENV-2 responsible for  
86 most of epidemics followed by DENV-1 [15]. In Tanzania, the presence of DENV-3  
87 and DENV-2 serotypes have been documented during the previous epidemics [6–  
88 8,15].

89         Although dengue is endemic in Africa, molecular epidemiology of circulating  
90 DENV is not well documented [17,18]. The increasing number of dengue outbreaks  
91 and improved access to laboratory diagnostic tools have allowed for more effective  
92 recognition of outbreaks through genomic-based surveillance [17,19]. The genomic-  
93 based surveillance can help to identify the specific pathogen causing epidemics,  
94 track sources and inform the public health authorities for appropriate interventions.

95         In Tanzania, few studies have reported molecular epidemiology of dengue  
96 virus [6,7]. In 2014, Jaswant performed partial sequencing of core pre-membrane  
97 junction region of DENV detected in patients during the 2013-2014 outbreak in Dar-  
98 es-salaam region and confirmed that DENV-2 serotype genetically close to isolates  
99 reported in China and Singapore was responsible for the epidemic [20]. However,  
100 genomic-based data are missing for DENV detected in the country during the  
101 subsequent epidemics in 2018 and 2019. The objective of this study was to perform  
102 molecular characterization of dengue viruses during the 2019 epidemic phase in  
103 Dar-es-Salaam, Tanzania.

104 **Methods**

105 **Study area**

106 This cross-sectional health facility-based study was carried out in Kinondoni and Ilala  
107 districts in Dar-es-Salaam, Tanzania (Fig 1). Dar-es-Salaam is usually hot and humid  
108 throughout the year with the main dry season from June to September and the short  
109 rainy season from October to December followed by long rainy season between  
110 March and May. The average daily temperature is 26 °C and total annual rainfall  
111 averages 1100 mm with relative humidity of 100% and 60% during the night and day  
112 time, respectively [21].

113

114 **Patients and sample collection**

115 Dengue-suspected patients were recruited from outpatients at four health facilities,  
116 International School of Tanganyika (IST) Clinic and Premier Care Clinic in Kinondoni  
117 and Doctors Plaza Hospital and Regency Medical Centre in Ilala district between  
118 March and May 2019. A total of 110 dengue-suspected outpatients were enrolled in  
119 the study. The inclusion criteria included patients with dengue-like illness and fever  
120 (body temperature > 38 °C) prior to onset of clinical manifestations presenting with at  
121 least one of the following clinical manifestations namely, retro-orbital pain, rash,  
122 arthralgia, malaise, signs of haemorrhaging and organ failure. Fever patients with  
123 bacterial infections and those unwilling to participate in this study were excluded.  
124 Haematology data were obtained from routine blood tests performed by the  
125 hospitals. All dengue positive cases were categorized clinically either as dengue  
126 fever (DF), dengue haemorrhagic fever (DHF), dengue shock syndrome (DSS), or  
127 expanded dengue syndrome (EDS), according to the World Health Organization  
128 guidelines [22].

129           Peripheral venous blood was collected into serum separator tubes for serum  
130 separation and testing. The on-site duo dengue NS1-IgG/IgM rapid test (CTK  
131 BIOTECH Inc, CA, USA) was used to detect the presence of NS1 antigen and  
132 IgG/IgM antibodies against DENV NS1. Aliquots of a total of 45 positive sera  
133 samples were kept in well-labeled cryotubes stored at -80 °C. Thereafter, sera  
134 samples were transported in a cool box with dry-ice to Sokoine University of  
135 Agriculture (SUA) molecular biology laboratory in Morogoro and kept at -80 °C until  
136 genomic analysis.

137

### 138 **RNA extraction**

139 Out of 45 sera samples, we focused on 20 samples that were selected randomly. A  
140 total of 60 µL viral nucleic acid (RNA) was extracted from 140 µL of each test sample  
141 using QIAamp RNA mini kit (Qiagen, Hilden, Germany) following the manufacturer's  
142 instructions. The extracted RNA was stored immediately in aliquots at -20 °C to avoid  
143 freeze-thawing cycles that could damage RNA stability. We also assessed the  
144 quality of extracted RNA by measuring absorbance at 260 and 280 nm using the  
145 NanoDrop ND1000 spectrophotometer (GE Healthcare UK Limited,  
146 Buckinghamshire, UK). The A260/280 ratio of ~2.0 was accepted as pure RNA [23].

147

### 148 **Detection of DENV RNA**

149 Dengue virus nucleic acid (RNA) was detected by RT-PCR using SuperScript III  
150 Platinum *Taq* DNA polymerase (Invitrogen, Carlsbad, CA, USA) One-Step RT-PCR  
151 following the manufacturer's instructions. RT-PCR amplification was performed with  
152 primers as previously described [24]. We prepared a 25 µL RT-PCR reaction  
153 containing 12.5 µL of 2x reaction mix, 1 µL of SuperScript III RT/Platinum *Taq* mix,

154 0.5  $\mu$ L of 10  $\mu$ M sense primer (D1), 0.5  $\mu$ L of 10  $\mu$ M anti-sense primer (D2), 0.5  $\mu$ L  
155 Magnesium salt (Invitrogen, CA, USA), 6  $\mu$ L of nuclease-free water and 4  $\mu$ L of RNA  
156 template. Reverse-transcription reaction was performed in 1 cycle at 48 °C for 30  
157 minutes, followed by one cycle of initial denaturation at 94 °C for 2 minutes. PCR  
158 amplification was done for 35 cycles of denaturation at 94 °C for 15 seconds,  
159 annealing at 55 °C for 30 seconds and elongation at 68 °C for 1 minute. This was  
160 followed by a final extension at 68 °C for 5 minutes. The RT-PCR products with the  
161 expected band size 511 base pairs (bp) were evaluated on 1.5% agarose gel stained  
162 with Gel Red (Biotium Inc, CA, USA) against 100 bp DNA ladder (Bio-Rad  
163 Laboratories, Hercules, CA, USA) at 100 V for 45 minutes. The specific PCR bands  
164 were visualized using Gel Doc EZ Imager system (Bio-Rad Laboratories, Hercules,  
165 CA, USA).

166

### 167 **Identification of DENV serotypes**

168 Reverse-transcription polymerase chain reaction (RT-PCR) was performed to detect  
169 DENV serotypes using serotype-specific primers. The amplification of serotype-  
170 specific nucleotide sequences was done in a 25  $\mu$ L RT-PCR reaction of each  
171 serotype test containing 12.5  $\mu$ L of 2x reaction mix, 1  $\mu$ L of SuperScript III  
172 RT/Platinum *Taq* mix (Invitrogen, CA, USA), 0.5  $\mu$ L of 10  $\mu$ M forward primer (D1),  
173 0.5  $\mu$ L of 10  $\mu$ M reverse primer (TS1/TS2/TS3/TS4) (Table 1), 0.5  $\mu$ L Magnesium  
174 salt (Invitrogen, CA, USA), 6  $\mu$ L of nuclease-free water and 4  $\mu$ L of RNA template.  
175 Reverse-transcription was performed in 1 cycle at 50 °C for 10 minutes, followed by  
176 initial denaturation at 94 °C for 2 minutes. PCR was done for 35 cycles of  
177 denaturation at 94 °C for 15 seconds, annealing at 55 °C for 30 seconds, elongation  
178 at 72 °C 1 minute and a final extension at 72 °C for 7 minutes. The expected sizes of

179 serotype-specific amplicons were 482 bp (DENV-1), 119 bp (DENV-2), 290 bp  
180 (DENV-3) and 392 bp (DENV-4). The PCR bands were analysed on 1.5% agarose  
181 gel against 100 bp DNA ladder (Bio-Rad Laboratories, Hercules, CA, USA) at 100 V  
182 for 45 min and visualized using Gel Doc EZ Imager system (Bio-Rad Laboratories,  
183 Hercules, CA, USA).

184

### 185 **Data analysis**

186 Socio-demographic data were entered in Microsoft Excel spreadsheet (MS-Excel  
187 2010, Microsoft Corp., and Redmond, WA, USA) and descriptive statistics [counts,  
188 percentages, median and interquartile range (IQR)] and relevant tables were used to  
189 summarize information. RT-PCR bands were analysed using Image Lab Software  
190 version 6.0.1 (Bio-Rad Laboratories, Hercules, CA, USA) and presented by gel  
191 images.

192

### 193 **Ethical consideration**

194 The study was approved by the Medical Research Coordinating Committee of the  
195 National Institute for Medical Research in Tanzania (Ref. No.  
196 NIMR/HQ/R.8a/Vol.IX/2974). Written consent was sought and obtained from all adults  
197 ( $\geq 18$  years) and assent was obtained from parents/guardians of children ( $<18$  years  
198 old) for screening of dengue virus infection. Oral consent was sought from dengue-  
199 positive individuals for further identification and genomic analysis and it was  
200 documented through tracking forms.

201

### 202 **Results**

#### 203 **Patient characteristics and dengue diagnosis**



204 A total of 110 sera samples was collected from dengue-suspected outpatients  
205 presented at health facilities with dengue-like illness . Among them, 45 (41%) were  
206 confirmed positive for dengue infection by NS1 antigen and/or DENV RNA detection  
207 with RT-PCR (95.5% positivity by RT-PCR and/or NS1 and 4.5% positivity by NS1  
208 only). The age of the patients ranged from 16-75 years old (median = 35, IQR= 18).  
209 Two-thirds of the patients (66.7%) were males; 62.2% had post-secondary education  
210 and the majority (46.7%) had formal employment (Table 2).

211

### 212 **Detection of DENV RNA and serotypes**

213 Dengue virus (DENV) nucleic acid (RNA) was detected in 17 of 20 tested samples  
214 while three samples were negative. Serotype-specific RT-PCR test was positive for  
215 DENV-1 (Fig 2A) and DENV-3 (Fig 2B) serotypes. Of the 17 positive samples, 17  
216 were positive for DENV-1, of which two samples were also positive for DENV-3. RT-  
217 PCR results for DENV-2 and DENV-4 serotypes were all negative. The overall  
218 results for RNA quality and RT-PCR amplification of the tested samples are  
219 summarized in Table 3.

220

### 221 **Discussion**

222 This study reports for the first time occurrence of dengue virus serotype 1 (DENV-1)  
223 in Tanzania. The occurrence of DENV-2 and DENV-3 has been reported during the  
224 previous outbreaks in 2010 and 2014 [6,7,25]. Our results indicate that DENV-1 was  
225 dominant serotype during the 2019 outbreak in Tanzania. DENV-1 has also been  
226 detected in Japan in a patient with a history of travel to Tanzania in May 2019 [26].  
227 The subsequent phylogenetic analysis indicated that the DENV-1 isolate detected in  
228 the Japanese traveller was genetically related to Singapore 2015 strain, suggesting

229 that the recent DENV-1 epidemic in Tanzania may have been imported from  
230 endemic countries.

231 The evidence of DENV-1 predominance in the East Africa region is  
232 increasingly been reported. In a recent study in Kenya, DENV-1 was found to  
233 account for 44% of all the serotypes that were detected in febrile patients [27]. The  
234 results from this study demonstrated that DENV-1 isolates were genetically close to  
235 isolates reported in endemic South-East Asian countries like Indonesia and India.  
236 Nevertheless, the risk of DENV-1 serotype importation to Tanzania can originate  
237 from countries other than South-East Asian countries due to increased movement  
238 networks of people. For instance, Mauritius has recently reported DENV-1 epidemic  
239 that included eleven imported cases from South-East Asia countries [9]. Circulation  
240 of DENV-1 serotypes in Africa has been previously reported in Cameroon, Comoros,  
241 Côte d'Ivoire, Djibouti, Gabon, Kenya, and Senegal [2,28].

242 Also, we report for the first time genomic-based evidence of dengue virus co-  
243 infection with DENV-1 and DENV-3 serotypes during a single phase of outbreak in  
244 Tanzania. Dengue concurrent infections have been commonly reported in endemic  
245 countries including Brazil [29] and India [30]. Dengue concurrent infections have  
246 serious clinical implication for patient management, as they can present with severe  
247 clinical manifestations such as haemorrhagic fever syndrome [31,32]. Previous  
248 findings showed that subsequent infection with a different serotype may lead to  
249 increased disease severity because antibodies against the previous serotype do not  
250 cross-neutralize the subsequent heterologous invading serotype, but induce  
251 antibody-dependent enhancement that increases replication inside target Fc  
252 receptor-bearing cells [33,34]. Co-infection with multiple DENV serotypes may  
253 increase the risk of emergence of recombinant strains that have different

254 characteristics and the areas with a circulation of more than one serotype have been  
255 classified as more prone to severe DENV infections [31,35]. Co-circulation of dengue  
256 virus serotypes and occurrence of serotypes co-infection in Tanzania provide alert  
257 on the possibility of an increased risk of severe dengue in the country.

258         It is worth noting important limitations of this study. This was a cross-sectional  
259 health facility-based study that focused on the detection of dengue viruses from  
260 outpatients during an epidemic phase, thus, it was not possible to establish an  
261 algorithm to classify primary and secondary dengue virus infections and sequence  
262 DENV RNA genomes that could provide insights on the evolution of circulating  
263 dengue viruses. Also, the health facility-based subjects included in the study may not  
264 be a representative of the population parameter estimates, suggesting that  
265 extrapolation of the results to unsampled locations should be made with caution.

266         In conclusion, the findings of this study indicate that DENV-1 is the dominant  
267 serotype during the on-going 2019 epidemic and reveal for the first time occurrence  
268 of dengue virus serotypes 1 and 3 co-concurrent infection in Tanzania. These  
269 observations emphasize the need for establishing continuous genomic-based  
270 surveillance of circulating dengue viruses in Tanzania. This will provide rapid  
271 evidence of emerging/re-emerging and spread of dengue viruses and inform public  
272 health authorities to implement effective preventive measures.

273

## 274 **Acknowledgments**

275 We are grateful to the Management of Regency Medical Centre, Doctor's Plaza  
276 Hospital, International School of Tanganyika Clinic and Premier Care Clinic for  
277 providing sera samples used in this study. Lancet Laboratories Tanzania is thanked  
278 for laboratory technical assistance in serum separation and testing. We would like to

279 thank Ms Mariam Makange of the Sokoine University of Agriculture Molecular  
280 Laboratory for her technical support during molecular laboratory analysis. We also,  
281 acknowledge the support from the Government of Tanzania and the World Bank  
282 through the SACIDS-Africa Centre of Excellence for Infectious Disease of Human  
283 and Animal.

284

### 285 **Conflicts of interest**

286 The authors declare the absence of any competing interests.

287

### 288 **Funding**

289 The study was supported by the Government of Tanzania and the World Bank (WB-  
290 ACE II Grant PAD1436) through SACIDS Africa Centre of Excellence for Infectious  
291 Diseases of Humans and Animals in Tanzania.

292

### 293 **References**

- 294 1. Bhatt S, Gething PW, Brady OJ, Messina JP, Farlow AW, Moyes CL, et al. The  
295 global distribution and burden of dengue. *Nature*. 2013;496: 504–507.  
296 doi:10.1038/nature12060
- 297 2. Amarasinghe A, Kuritsky JN, Letson GW, Margolis HS. Dengue Virus Infection  
298 in Africa. *Emerg Infect Dis*. 2011;17: 1349–1354. doi:10.3201/eid1708.101515
- 299 3. Weekly bulletins on outbreaks and other emergencies. In: WHO | Regional  
300 Office for Africa [Internet]. [cited on 23 Jul 2019]. Available:  
301 [https://www.afro.who.int/health-topics/disease-outbreaks/outbreaks-and-other-](https://www.afro.who.int/health-topics/disease-outbreaks/outbreaks-and-other-emergencies-updates)  
302 [emergencies-updates](https://www.afro.who.int/health-topics/disease-outbreaks/outbreaks-and-other-emergencies-updates)

- 303 4. Gubler DJ. Dengue, urbanization and globalization: the unholy trinity of the 21st  
304 century. *Trop Med and Health*. 2011;39: S3–S11. doi.org/10.2149/tmh.2011-  
305 S05
- 306 5. Christie J. Remarks on “Kidinga Pepo”: a peculiar form of exanthematous  
307 disease. *Br Med J*. 1872;1: 577. doi.10.1136/bmj.1.596.577
- 308 6. Vairo F, Nicastrì E, Meschi S, Schepisi MS, Paglia MG, Bevilacqua N, et al.  
309 Seroprevalence of dengue infection: A cross-sectional survey in mainland  
310 Tanzania and on Pemba Island, Zanzibar. *IJ Infect Dis*. 2012;16: 2011–2013.  
311 doi:10.1016/j.ijid.2011.09.018
- 312 7. Mboera LEG, Mweya CN, Rumisha SF, Tungu PK, Stanley G, Makange MR, et  
313 al. The Risk of Dengue Virus Transmission in Dar es Salaam, Tanzania during  
314 an Epidemic Period of 2014. *PLoS Negl Trop Dis*. 2016;10: 1–15.  
315 doi:10.1371/journal.pntd.0004313
- 316 8. Gautret P, Simon F, Askling HH, Bouchaud O, Leparç-Goffart I, Ninove L, et al.  
317 Dengue type 3 virus infections in European travellers returning from the  
318 Comoros and Zanzibar, February-April 2010. *Eurosurv*. 2010;15: 19541.  
319 doi.10.2807/ese.15.15.19541-en
- 320 9. Weekly bulletins on outbreaks and other emergencies. In: WHO | Regional  
321 Office for Africa [Internet]. [cited on 7 Aug 2019]. Available:  
322 [https://www.afro.who.int/health-topics/disease-outbreaks/outbreaks-and-other-](https://www.afro.who.int/health-topics/disease-outbreaks/outbreaks-and-other-emergencies-updates)  
323 [emergencies-updates](https://www.afro.who.int/health-topics/disease-outbreaks/outbreaks-and-other-emergencies-updates)

324

- 325 10. Weekly bulletins on outbreaks and other emergencies. In: WHO | Regional  
326 Office for Africa [Internet]. [cited on 26 Aug 2019]. Available:  
327 [https://www.afro.who.int/health-topics/disease-outbreaks/outbreaks-and-other-](https://www.afro.who.int/health-topics/disease-outbreaks/outbreaks-and-other-emergencies-updates)  
328 [emergencies-updates](https://www.afro.who.int/health-topics/disease-outbreaks/outbreaks-and-other-emergencies-updates)
- 329 11. Mustafa MS, Rasotgi V, Jain S, Gupta V. Discovery of fifth serotype of dengue  
330 virus (DENV-5): A new public health dilemma in dengue control. *Med J Arm*  
331 *Forc India*. 2015;71: 67–70. doi:10.1016/j.mjafi.2014.09.011
- 332 12. WHO. World Health Organization, Special Programme for Research, Training in  
333 Tropical Diseases, World Health Organization. Department of Control of  
334 Neglected Tropical Diseases, World Health Organization. Epidemic, Pandemic  
335 Alert. Dengue: guidelines for diagnosis, treatment, prevention and control.  
336 World Health Organization 2009. pp. 139-140 [cited on 5 Jul 2019].
- 337 13. Nimmagadda SS, Mahabala C, Bolor A, Raghuram PM, Nayak U. A. Atypical  
338 Manifestations of Dengue Fever (DF) – Where Do We Stand Today? *J Clin*  
339 *Diagn Res*. 2014;8: 71–73. doi:10.7860/JCDR/2014/6885.3960
- 340 14. Murray NEA, Quam MB, Wilder-Smith A. Epidemiology of dengue: past, present  
341 and future prospects. *Clin Epidemiol*. 2013;5: 299–309.  
342 doi:10.2147/CLEP.S34440
- 343 15. Sang RC. Dengue in Africa. In Report of the scientific working group meeting on  
344 dengue. Geneva: WHO Special Programme for Research and Training in  
345 Tropical Diseases 2007. pp. 50-2. [Cited on 5 Jul 2019].
- 346

- 347 16. Vairo F, Mboera LEG, de Nardo P, Oriyo NM, Meschi S, Rumisha SF, et al.  
348 Clinical, virologic, and epidemiologic characteristics of dengue outbreak, Dar es  
349 Salaam, Tanzania, 2014. *Emerg Infect Dis.* 2016;22: 895–899.  
350 doi:10.3201/eid2205.151462
- 351 17. Hill SC, Neto de Vasconcelos J, Granja BG, Thézé J, Jandondo D, Neto Z, et al.  
352 Early Genomic Detection of Cosmopolitan Genotype of Dengue Virus Serotype  
353 2, Angola, 2018. *Emerg Infect Dis.* 2019;25: 784–787.  
354 doi:10.3201/eid2504.180958
- 355 18. Sharp TM, Moreira R, Soares MJ, da Costa LM, Mann J, DeLorey M, et al.  
356 Underrecognition of dengue during 2013 epidemic in Luanda, Angola. *Emerg*  
357 *Infect Dis.* 2015;21: 1311. doi: 10.3201/eid2108.150368
- 358 19. Jaenisch T, Junghanss T, Wills B, Brady OJ, Eckerle I, Farlow A, et al. Dengue  
359 Expansion in Africa—Not Recognized or Not Happening? *Emerg Infect Dis.*  
360 2014;20. doi:10.3201/eid2010.140487
- 361 20. Jaswant G. Detection and genetic characterisation of dengue virus among  
362 patients in Dar es salaam, Tanzania during the 2013-2014 outbreak. PhD  
363 Thesis, Sokoine University of Agriculture. 2015. [cited on 5 Jul 2019].
- 364 21. Trpis M. Seasonal changes in the larval populations of *Aedes aegypti* in two  
365 biotopes in Dar es Salaam, Tanzania. *Bulletin of the World Health Organization.*  
366 1972;47: 245.
- 367 22. World Health Organization. Comprehensive Guidelines for Prevention and  
368 Control of Dengue and Dengue haemorrhagic fever 2011. pp. 31-40 [Cited on 5  
369 Jul 2019].

- 370 23. Desjardins P, Conklin D. NanoDrop microvolume quantitation of nucleic acids. *J*  
371 *Vis Exp.* 2010; e2565. doi: 10.3791/2565.
- 372 24. Lanciotti RS, Calisher CH, Gubler DJ, Chang G-J, Vorndam AV. Rapid  
373 detection and typing of dengue viruses from clinical samples by using reverse  
374 transcriptase-polymerase chain reaction. *J Clinical Microbiol.* 1992;30: 545–551.
- 375 25. Moi ML, Takasaki T, Kotaki A, Tajima S, Lim C-K, Sakamoto M, et al.  
376 Importation of dengue virus type 3 to Japan from Tanzania and Côte d'Ivoire.  
377 *Emerg Infect Dis.* 2010;16: 1770. doi: 10.3201/eid1611.101061
- 378 26. Okada K, Morita R, Egawa K, Hirai Y, Kaida A, Shirano M, et al. Dengue Virus  
379 Type 1 Infection in Traveler Returning from Tanzania to Japan, 2019. *Emerg*  
380 *Infect Dis.* 2019;25.
- 381 27. Konongoi L, Ofula V, Nyunja A, Owaka S, Koka H, Makio A, et al. Detection of  
382 dengue virus serotypes 1, 2 and 3 in selected regions of Kenya: 2011–2014.  
383 *Virology J.* 2016;13: 182. doi:10.1186/s12985-016-0641-0
- 384 28. de Laval F, Plumet S, Simon F, Deparis X, Leparac-Goffart I. Dengue  
385 surveillance among French military in Africa. *Emerg infect Dis.* 2012;18(2):342-  
386 3. doi: 10.3201/eid1802.111333
- 387 29. Andrade EH, Figueiredo LB, Vilela AP, Rosa JC, Oliveira JG, Zibaoui HM, et al.  
388 Spatial-temporal Co-circulation of dengue virus 1, 2, 3, and 4 associated with  
389 coinfection cases in a hyperendemic area of Brazil: a 4-week survey. *The Am J*  
390 *Trop Med and Hyg.* 2016;94: 1080–1084. doi.10.4269/ajtmh.15-0892



- 391 30. Reddy MN, Dungdung R, Valliyott L, Pilankatta R. Occurrence of concurrent  
392 infections with multiple serotypes of dengue viruses during 2013–2015 in  
393 northern Kerala, India. *PeerJ*. 2017;5: e2970. doi:10.7717/peerj.2970
- 394 31. VinodKumar CS, Kalapannavar NK, Basavarajappa KG, Sanjay D, Gowli C,  
395 Nadig NG, et al. Episode of coexisting infections with multiple dengue virus  
396 serotypes in central Karnataka, India. *J Infect and Public Health*. 2013;6: 302–  
397 306. doi:10.1016/j.jiph.2013.01.004
- 398 32. Bharaj P, Chahar HS, Pandey A, Diddi K, Dar L, Guleria R, et al. Concurrent  
399 infections by all four dengue virus serotypes during an outbreak of dengue in  
400 2006 in Delhi, India. *Virologica*. 2008;5: 1. doi:10.1186/1743-422X-5-1
- 401 33. Katzelnick LC, Coloma J, Harris E. Dengue: knowledge gaps, unmet needs, and  
402 research priorities. *Lancet Infect Dis*. 2017;17: e88–e100. doi: 10.1016/S1473-  
403 3099(16)30473-X
- 404 34. Dejnirattisai W, Jumnainsong A, Onsirisakul N, Fitton P, Vasanawathana S,  
405 Limpitikul W, et al. Cross-Reacting Antibodies Enhance Dengue Virus Infection  
406 in Humans. *Science*. 2010;328: 745–748. doi:10.1126/science.1185181
- 407 35. Vaddadi K, Gandikota C, Jain PK, Prasad VSV, Venkataramana M. Co-  
408 circulation and co-infections of all dengue virus serotypes in Hyderabad, India  
409 2014. *Epidemiol Infect*. 2017;145: 2563–2574.  
410 doi:10.1017/S0950268817001479  
411

412 **Figure legends**

413 **Fig 1: Study location and sample collection sites.**

414 Source: This map was designed and drawn in this study

415 **Fig 2: Agarose gel electrophoresis image for RT-PCR amplified serotype-**  
416 **specific DENV DNA products.**

417 (A) Dengue virus serotype 1 (482 bp), M is a 100 bp DNA ladder, 13-20 are test sera  
418 samples, P1, P2 are positive controls (CDC KK0129) and N1, N2 are the negative  
419 controls.

420 (B) Dengue virus serotype 3 (290 bp), M is a 100 bp DNA ladder, 1-10 are test sera  
421 samples, N is the negative control and P is positive control (CDC KK0129).

**Table 1: Primers used in RT-PCR amplification**

| <b>Primer</b> | <b>Sequence ('5-&gt;3')</b>   | <b>Amplicon size (bp)</b> | <b>Ref</b> |
|---------------|-------------------------------|---------------------------|------------|
| D1            | TCAATATGCTGAAACGCGCGAGAAACCG  | 511                       | [24]       |
| D2            | TTGCACCAACAGTCAATGTCTTCAGGTTC | 511                       | [24]       |
| TS1           | CGTCTCAGTGATCCGGGGG           | 482 (DENV-1)              | [24]       |
| TS2           | CGCCACAAGGGCCATGAACAG         | 119 (DENV-2)              | [24]       |
| TS3           | TAACATCATCATGAGACAGAGC        | 290 (DENV-3)              | [24]       |
| TS4           | CTCTGTTGTCTTAAACAAGAGA        | 392 (DENV-4)              | [24]       |

**Table 2: Socio-demographic characteristics of the confirmed dengue-positive patients (n=45)**

| <b>Characteristic</b> | <b>Total participants (%)</b> |
|-----------------------|-------------------------------|
| Age group             |                               |
| < 18                  | 4 (8.9)                       |
| 18-24                 | 5 (11.1)                      |
| 25-34                 | 9 (20)                        |
| 35-44                 | 14 (31.1)                     |
| 45-54                 | 6 (13.3)                      |
| 55 and above          | 7(15.6)                       |
| Sex                   |                               |
| Male                  | 30 (66.7)                     |
| Female                | 15 (33.3)                     |
| Education             |                               |
| None                  | 2 (4.4)                       |
| Primary               | 1 (2.2)                       |
| Secondary             | 14 (31.1)                     |
| College/University    | 28 (62.2)                     |
| Occupation            |                               |
| Self employed         | 13 (28.9)                     |
| Business              | 4 (8.8)                       |
| Formal employment     | 21 (46.7)                     |
| Students              | 7(15.6)                       |

**Table 3: RNA quality and RT-PCR results of the tested sera (n=20)**

| Sample ID | District  | *Hospital | Sex | Age | RNA quality (A260/280) | DENV RNA       | Serotype              |
|-----------|-----------|-----------|-----|-----|------------------------|----------------|-----------------------|
| 1         | Kinondoni | RMC       | M   | 16  | 2.83                   | + <sup>a</sup> | DENV-1                |
| 2         | Kinondoni | RMC       | M   | 48  | 2.25                   | +              | DENV-1                |
| 3         | Ilala     | DPH       | M   | 45  | 1.54                   | +              | DENV-1                |
| 4         | Kinondoni | IST       | F   | 34  | 2.75                   | +              | DENV-1                |
| 5         | Kinondoni | DPH       | F   | 36  | 1.42                   | - <sup>b</sup> | N/A <sup>c</sup>      |
| 6         | Temeke    | RMC       | M   | 56  | 2.09                   | +              | DENV-1                |
| 7         | Temeke    | RMC       | M   | 26  | 2.45                   | +              | DENV-1                |
| 8         | Kinondoni | DPH       | M   | 35  | 2.22                   | +              | DENV-1                |
| 9         | Kinondoni | DPHC      | M   | 44  | 1.57                   | +              | DENV-1/3 <sup>d</sup> |
| 10        | Temeke    | PC        | M   | 40  | 1.66                   | +              | DENV-1/3              |
| 11        | Ilala     | PC        | M   | 65  | 4.98                   | +              | DENV-1                |
| 12        | Kinondoni | IST       | M   | 29  | 5.39                   | +              | DENV-1                |
| 13        | Ilala     | RMC       | M   | 22  | 1.69                   | -              | N/A                   |
| 14        | Kinondoni | DPH       | M   | 33  | 2.81                   | +              | DENV-1                |
| 15        | Kinondoni | DPH       | M   | 20  | 2.61                   | +              | DENV-1                |
| 16        | Kinondoni | PC        | M   | 27  | 1.53                   | -              | N/A                   |
| 17        | Kinondoni | PC        | M   | 21  | 1.95                   | +              | DENV-1                |
| 18        | Ilala     | IST       | F   | 37  | 2.00                   | +              | DENV-1                |
| 19        | Kinondoni | RMC       | M   | 21  | 2.14                   | +              | DENV-1                |
| 20        | Kinondoni | RMC       | F   | 31  | 2.43                   | +              | DENV-1                |

<sup>a</sup>Positive for dengue virus nucleic acid (DENV RNA) reverse-transcription polymerase chain reaction test (RT-PCR); <sup>b</sup> Negative for DENV RNA-RT-PCR test; <sup>c</sup>N/A, Not applicable; <sup>d</sup>Positive for DENV serotypes 1 and 3 RT-PCR test; \*RMC, Regency Medical Centre; DPH, Doctors Plaza Hospital; IST, International School of Tanganyika Clinic and PC, Premier Care Clinic.

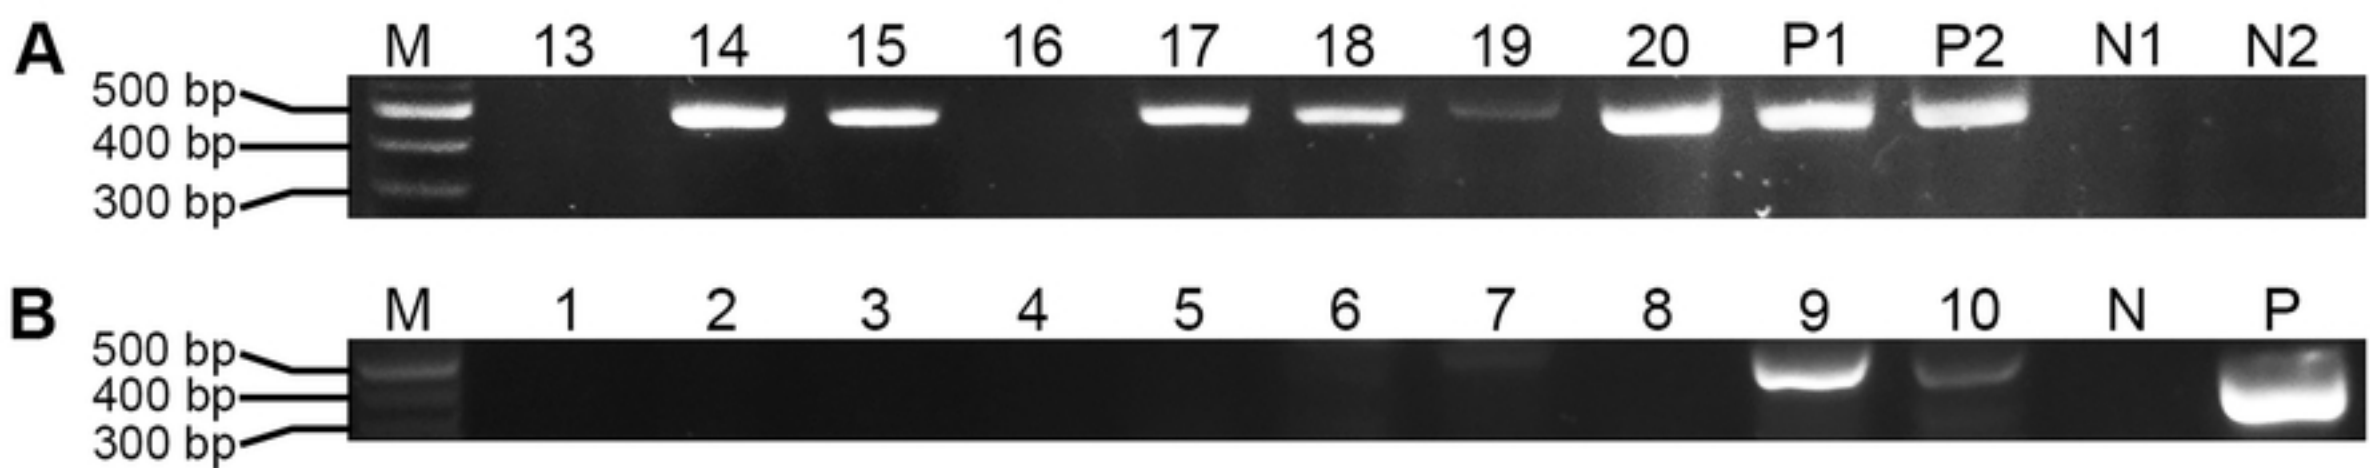

Gel electrophoresis of RT-PCR amplified DENV serotype-specific

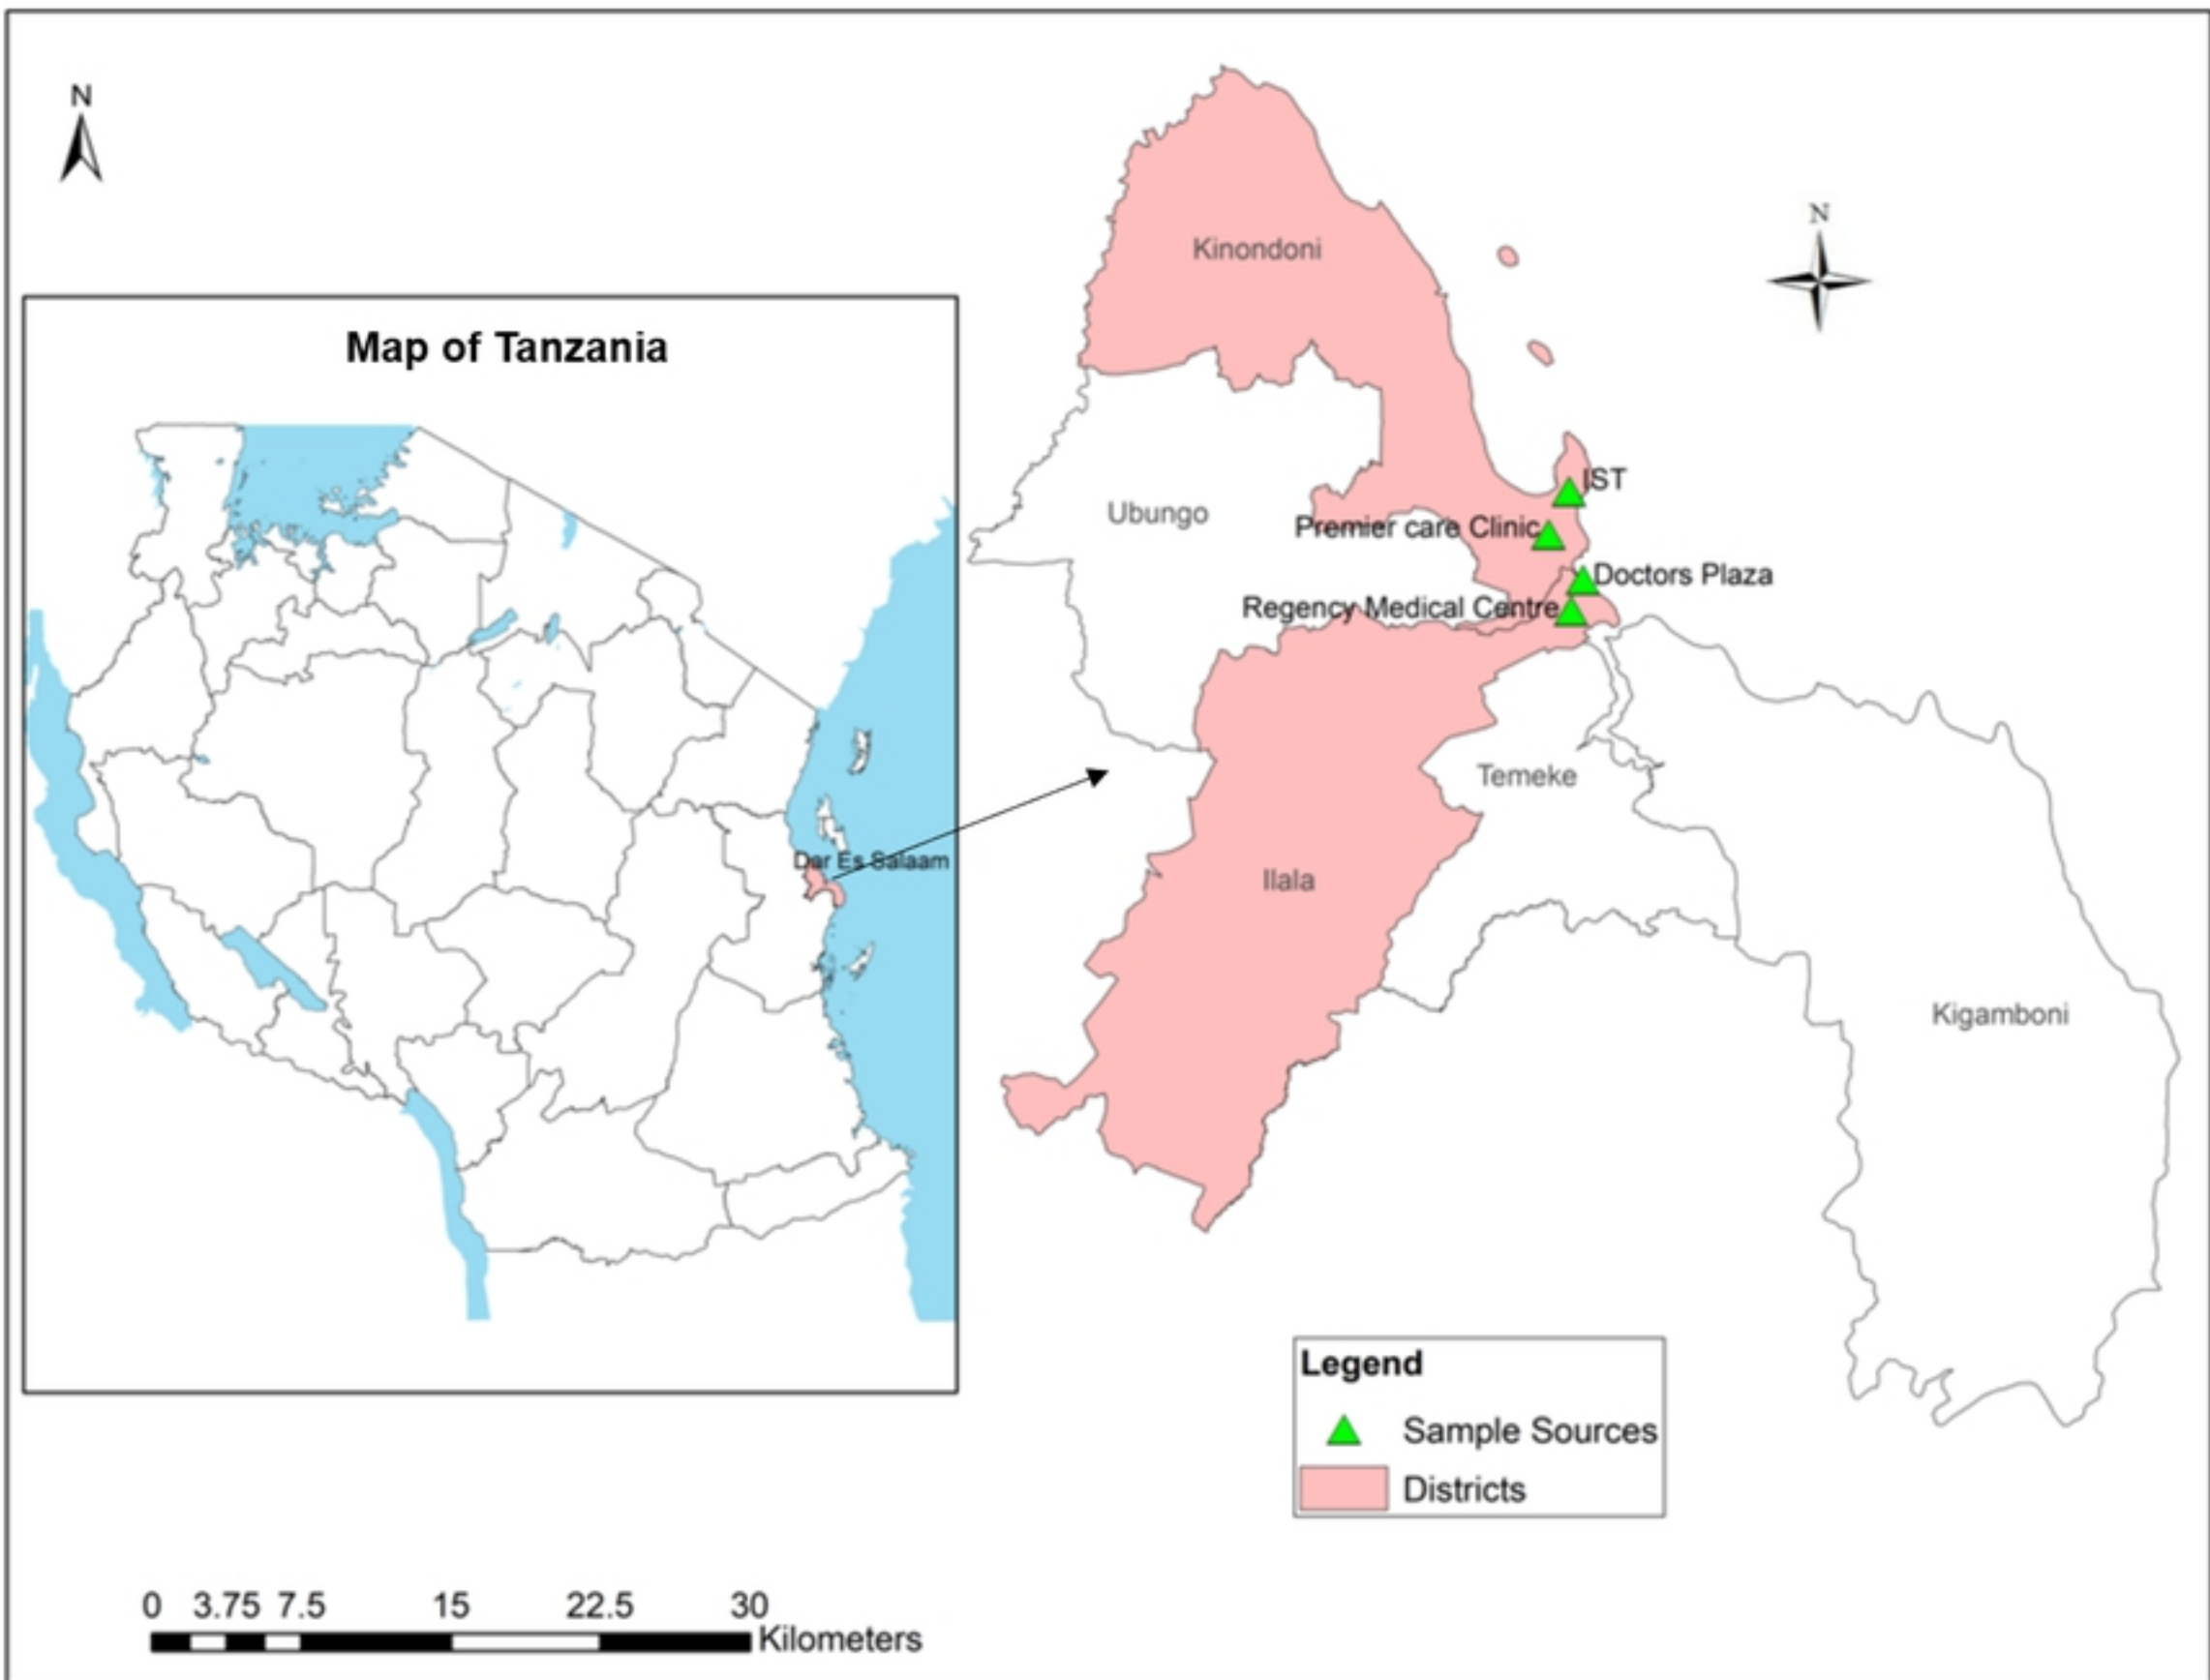

Study area
